# Supplementary material for: Effect of eHealth-delivered exercise programmes on balance in people aged 65 years and over living in the community: a systematic review and meta-analysis of randomised controlled trials
Source: HighWire-hosted journal article supplement (doi:10.1136/bmjopen-2021-051377), 2022-06-01

**Supplementary Figure 2** Funnel plot of standard error by Hedges' g for trial included in the meta-analysis for balance, fear of falling and fall risk. Each circle represents one trial.

**a) Static balance**

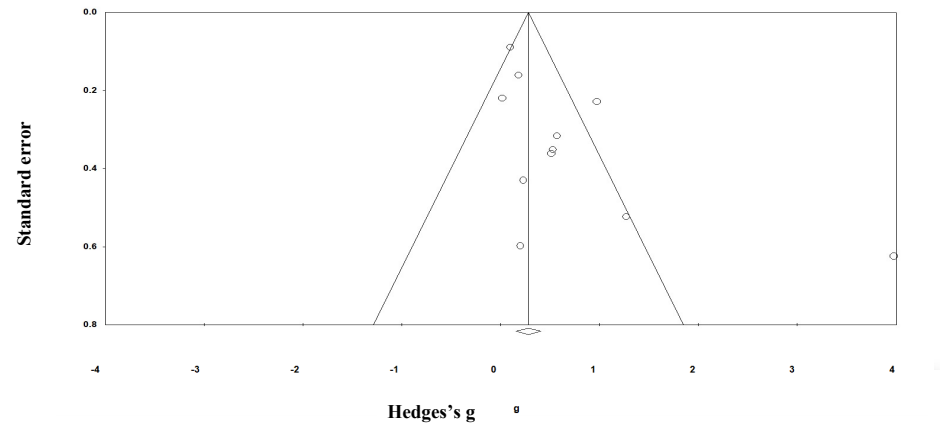

**b) Dynamic balance**

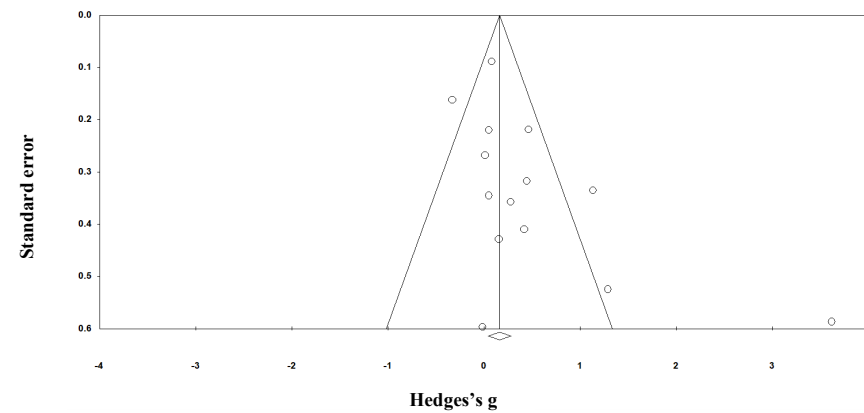

Supplement: bmjopen-2021-051377supp002_data_supplement.pdf [file bmjopen-2021-051377supp002_data_supplement.pdf]
